# Supplementary material for: Network-Based Prediction and Analysis of HIV Dependency Factors
Source: PLoS Comput Biol. 2011 Sep 22;7(9):e1002164. doi: 10.1371/journal.pcbi.1002164 (PMC3178628; doi:10.1371/journal.pcbi.1002164)
Supplement: Table S3 — Comparison of FuncAssociate results between BKZ HDFs and HDFs predicted by SinkSource+. For each function in this table, the column titled “N (BKZ)” contains the number of BKZ HDFs annotated with the function, and the column titled “X (BKZ)” contains the number of genes annotated with the function. For SinkSource+, the corresponding columns and the column “M (SinkSource+)” refer to the most statistically-significant prefix of the SinkSource+ predictions ordered by rank. See the FuncAssociate documentation (http://llama.mshri.on.ca/funcassociate/documentation) for details. Note that a p-value of 0 only means that the observed statistic was never seen in the permuted data. Since we ran FuncAssociate with 1,000 permutations, a p-value may be taken to a value less than 0.001. (XLS) [file pcbi.1002164.s013.xls]

## Sheet: supplementary-table-3
GO id	GO term	Enriched in	p-value (SinkSource+)	N (SinkSource+)	X (SinkSource+)	M (SinkSource+)	p-value (BKZ)	N (BKZ)	X (BKZ)	M (BKZ)
GO:0000028	ribosomal small subunit assembly	SinkSource+	0.014	4	4	474
GO:0000075	cell cycle checkpoint	SinkSource+	0	35	86	991
GO:0000090	mitotic anaphase	SinkSource+	0.001	6	7	592
GO:0000104	succinate dehydrogenase activity	SinkSource+	0.025	4	5	350
GO:0000118	histone deacetylase complex	SinkSource+	0.001	14	36	987
GO:0000127	transcription factor TFIIIC complex	SinkSource+	0.037	4	6	302
GO:0000152	nuclear ubiquitin ligase complex	SinkSource+	0.001	12	27	848
GO:0000166	nucleotide binding	SinkSource+	0	209	2169	981
GO:0000226	microtubule cytoskeleton organization	SinkSource+	0.001	15	122	290
GO:0000245	spliceosome assembly	SinkSource+	0.002	5	25	68
GO:0000275	mitochondrial proton-transporting ATP synthase complex, catalytic core F(1)	SinkSource+	0.002	4	4	293
GO:0000276	mitochondrial proton-transporting ATP synthase complex, coupling factor F(o)	SinkSource+	0	6	8	231
GO:0000280	nuclear division	SinkSource+	0	48	191	701
GO:0000339	RNA cap binding	SinkSource+	0.02	6	9	782
GO:0000375	RNA splicing, via transesterification reactions	SinkSource+	0	21	63	137
GO:0000377	RNA splicing, via transesterification reactions with bulged adenosine as nucleophile	SinkSource+	0	16	50	137
GO:0000387	spliceosomal snRNP assembly	SinkSource+	0	17	32	343
GO:0000398	nuclear mRNA splicing, via spliceosome	SinkSource+	0	16	50	137
GO:0000428	DNA-directed RNA polymerase complex	Both	0.045	11	25	347	0.045	8	24	347
GO:0000444	MIS12/MIND type complex	SinkSource+	0.002	4	4	273
GO:0000502	proteasome complex	SinkSource+	0	27	55	415
GO:0000718	nucleotide-excision repair, DNA damage removal	SinkSource+	0	15	22	676
GO:0000723	telomere maintenance	SinkSource+	0.001	13	30	990
GO:0000775	chromosome, centromeric region	SinkSource+	0	18	53	291
GO:0000776	kinetochore	SinkSource+	0	35	66	338
GO:0000777	condensed chromosome kinetochore	SinkSource+	0	33	50	338
GO:0000779	condensed chromosome, centromeric region	SinkSource+	0.001	6	11	291
GO:0000780	condensed nuclear chromosome, centromeric region	SinkSource+	0.002	7	9	931
GO:0000781	chromosome, telomeric region	SinkSource+	0.002	12	28	990
GO:0000808	origin recognition complex	SinkSource+	0.001	7	8	876
GO:0002504	antigen processing and presentation of peptide or polysaccharide antigen via MHC class II	SinkSource+	0.031	9	22	922
GO:0003674	molecular_function	SinkSource+	0	936	14379	992
GO:0003676	nucleic acid binding	SinkSource+	0	374	3113	992
GO:0003677	DNA binding	SinkSource+	0	198	2224	998
GO:0003684	damaged DNA binding	SinkSource+	0.022	13	45	954
GO:0003688	DNA replication origin binding	SinkSource+	0.003	6	7	876
GO:0003689	DNA clamp loader activity	SinkSource+	0.031	4	4	546
GO:0003697	single-stranded DNA binding	SinkSource+	0	17	54	897
GO:0003702	RNA polymerase II transcription factor activity	SinkSource+	0	24	242	351
GO:0003707	steroid hormone receptor activity	SinkSource+	0.003	14	45	992
GO:0003711	transcription elongation regulator activity	SinkSource+	0.011	6	20	268
GO:0003712	transcription cofactor activity	SinkSource+	0.001	50	351	995
GO:0003713	transcription coactivator activity	SinkSource+	0.002	35	207	995
GO:0003723	RNA binding	Both	0.029	162	718	763	0.029	66	713	763
GO:0003729	mRNA binding	SinkSource+	0.035	16	71	937
GO:0003735	structural constituent of ribosome	SinkSource+	0	72	157	478
GO:0003743	translation initiation factor activity	SinkSource+	0	19	39	782
GO:0003899	DNA-directed RNA polymerase activity	Both	0	17	39	753	0	12	39	753
GO:0003954	NADH dehydrogenase activity	SinkSource+	0	28	44	173
GO:0004129	cytochrome-c oxidase activity	SinkSource+	0	10	27	253
GO:0004298	threonine-type endopeptidase activity	SinkSource+	0	10	19	322
GO:0004407	histone deacetylase activity	SinkSource+	0.002	9	15	985
GO:0004879	ligand-dependent nuclear receptor activity	SinkSource+	0.002	15	48	992
GO:0005083	small GTPase regulator activity	SinkSource+	0	56	269	652
GO:0005085	guanyl-nucleotide exchange factor activity	SinkSource+	0	35	138	680
GO:0005088	Ras guanyl-nucleotide exchange factor activity	SinkSource+	0	33	83	680
GO:0005089	Rho guanyl-nucleotide exchange factor activity	SinkSource+	0	32	69	680
GO:0005092	GDP-dissociation inhibitor activity	SinkSource+	0.002	6	7	610
GO:0005096	GTPase activator activity	SinkSource+	0	58	217	647
GO:0005099	Ras GTPase activator activity	SinkSource+	0.001	19	94	680
GO:0005100	Rho GTPase activator activity	SinkSource+	0	17	27	680
GO:0005198	structural molecule activity	SinkSource+	0	75	572	478
GO:0005487	nucleocytoplasmic transporter activity	BKZ					0.021	5	7	478
GO:0005488	binding	SinkSource+	0	842	11782	992
GO:0005515	protein binding	SinkSource+	0	732	7839	999
GO:0005575	cellular_component	SinkSource+	0	690	15304	711
GO:0005622	intracellular	SinkSource+	0	184	1807	660
GO:0005634	nucleus	SinkSource+	0	540	4841	992
GO:0005635	nuclear envelope	SinkSource+	0	17	93	338
GO:0005643	nuclear pore	SinkSource+	0	23	60	938
GO:0005654	nucleoplasm	SinkSource+	0	196	488	991
GO:0005658	alpha DNA polymerase:primase complex	SinkSource+	0.006	5	5	815
GO:0005663	DNA replication factor C complex	SinkSource+	0.003	5	5	732
GO:0005665	DNA-directed RNA polymerase II, core complex	SinkSource+	0.001	5	14	75
GO:0005667	transcription factor complex	SinkSource+	0	28	191	356
GO:0005669	transcription factor TFIID complex	SinkSource+	0	13	18	613
GO:0005675	holo TFIIH complex	SinkSource+	0.001	6	10	325
GO:0005680	anaphase-promoting complex	SinkSource+	0	11	23	692
GO:0005681	spliceosomal complex	Both	0	36	143	100	0	24	141	100
GO:0005683	U7 snRNP	SinkSource+	0	6	10	76
GO:0005694	chromosome	SinkSource+	0	43	243	864
GO:0005730	nucleolus	SinkSource+	0.011	47	445	823
GO:0005736	DNA-directed RNA polymerase I complex	SinkSource+	0.004	4	4	347
GO:0005737	cytoplasm	SinkSource+	0	396	4349	999
GO:0005739	mitochondrion	SinkSource+	0	74	1221	296
GO:0005743	mitochondrial inner membrane	SinkSource+	0	61	255	308
GO:0005746	mitochondrial respiratory chain	SinkSource+	0.035	5	15	235
GO:0005747	mitochondrial respiratory chain complex I	SinkSource+	0	27	43	173
GO:0005749	mitochondrial respiratory chain complex II	SinkSource+	0.025	4	5	350
GO:0005753	mitochondrial proton-transporting ATP synthase complex	SinkSource+	0	12	17	294
GO:0005819	spindle	SinkSource+	0	23	82	991
GO:0005829	cytosol	SinkSource+	0	252	1233	999
GO:0005838	proteasome regulatory particle	SinkSource+	0	7	8	323
GO:0005839	proteasome core complex	SinkSource+	0	10	13	322
GO:0005840	ribosome	SinkSource+	0	73	188	478
GO:0005852	eukaryotic translation initiation factor 3 complex	SinkSource+	0	11	14	700
GO:0005876	spindle microtubule	SinkSource+	0.001	13	31	930
GO:0006091	generation of precursor metabolites and energy	SinkSource+	0	50	257	308
GO:0006119	oxidative phosphorylation	SinkSource+	0.008	5	10	293
GO:0006120	mitochondrial electron transport, NADH to ubiquinone	SinkSource+	0	26	43	172
GO:0006122	mitochondrial electron transport, ubiquinol to cytochrome c	SinkSource+	0.011	4	8	157
GO:0006139	nucleobase, nucleoside, nucleotide and nucleic acid metabolic process	Both	0	337	1721	998	0	135	1643	998
GO:0006259	DNA metabolic process	SinkSource+	0	104	494	991
GO:0006260	DNA replication	SinkSource+	0	62	169	990
GO:0006270	DNA replication initiation	SinkSource+	0	14	16	970
GO:0006275	regulation of DNA replication	SinkSource+	0.027	17	74	990
GO:0006281	DNA repair	SinkSource+	0	54	271	991
GO:0006283	transcription-coupled nucleotide-excision repair	SinkSource+	0.032	4	6	284
GO:0006289	nucleotide-excision repair	SinkSource+	0.001	9	29	366
GO:0006297	nucleotide-excision repair, DNA gap filling	SinkSource+	0	14	16	732
GO:0006308	DNA catabolic process	SinkSource+	0.001	16	60	722
GO:0006310	DNA recombination	SinkSource+	0.003	22	104	991
GO:0006350	transcription	SinkSource+	0	43	276	367
GO:0006351	transcription, DNA-dependent	SinkSource+	0	37	219	367
GO:0006352	transcription initiation	Both	0	38	95	356	0	20	92	356
GO:0006354	RNA elongation	Both	0.001	32	52	344	0.001	13	51	344
GO:0006364	rRNA processing	SinkSource+	0.002	16	101	474
GO:0006366	transcription from RNA polymerase II promoter	SinkSource+	0	25	177	351
GO:0006367	transcription initiation from RNA polymerase II promoter	Both	0	33	79	344	0	20	77	344
GO:0006368	RNA elongation from RNA polymerase II promoter	Both	0	31	48	344	0	13	47	344
GO:0006370	mRNA capping	SinkSource+	0	4	4	82
GO:0006376	mRNA splice site selection	SinkSource+	0.002	5	15	97
GO:0006378	mRNA polyadenylation	SinkSource+	0	6	10	62
GO:0006379	mRNA cleavage	SinkSource+	0	7	11	82
GO:0006383	transcription from RNA polymerase III promoter	SinkSource+	0	11	19	356
GO:0006396	RNA processing	Both	0	82	560	103	0	64	558	103
GO:0006397	mRNA processing	Both	0.002	67	299	100	0.002	36	289	100
GO:0006398	histone mRNA 3'-end processing	SinkSource+	0	5	6	91
GO:0006405	RNA export from nucleus	SinkSource+	0	15	43	765
GO:0006412	translation	SinkSource+	0	71	210	474
GO:0006413	translational initiation	SinkSource+	0	25	41	589
GO:0006414	translational elongation	SinkSource+	0	80	102	666
GO:0006417	regulation of translation	SinkSource+	0	30	149	937
GO:0006446	regulation of translational initiation	SinkSource+	0	17	44	782
GO:0006461	protein complex assembly	SinkSource+	0	51	493	356
GO:0006511	ubiquitin-dependent protein catabolic process	Both	0.03	51	240	759	0.03	29	227	759
GO:0006754	ATP biosynthetic process	SinkSource+	0.002	12	85	294
GO:0006807	nitrogen compound metabolic process	SinkSource+	0	343	2120	998
GO:0006810	transport	SinkSource+	0	72	2517	178
GO:0006818	hydrogen transport	SinkSource+	0	15	61	294
GO:0006839	mitochondrial transport	SinkSource+	0	14	68	294
GO:0006913	nucleocytoplasmic transport	SinkSource+	0	33	120	982
GO:0006915	apoptosis	SinkSource+	0	66	498	967
GO:0006917	induction of apoptosis	SinkSource+	0	65	315	998
GO:0006974	response to DNA damage stimulus	SinkSource+	0	64	354	991
GO:0006996	organelle organization	SinkSource+	0	162	1273	990
GO:0007010	cytoskeleton organization	SinkSource+	0	48	401	660
GO:0007017	microtubule-based process	SinkSource+	0.011	18	221	338
GO:0007049	cell cycle	SinkSource+	0	110	482	991
GO:0007051	spindle organization	SinkSource+	0.036	13	48	935
GO:0007052	mitotic spindle organization	SinkSource+	0.01	8	15	935
GO:0007059	chromosome segregation	SinkSource+	0	31	54	799
GO:0007067	mitosis	SinkSource+	0	48	191	701
GO:0007080	mitotic metaphase plate congression	SinkSource+	0.01	7	11	930
GO:0007088	regulation of mitosis	SinkSource+	0.018	15	57	991
GO:0007093	mitotic cell cycle checkpoint	SinkSource+	0	18	39	991
GO:0007264	small GTPase mediated signal transduction	SinkSource+	0	42	283	710
GO:0007265	Ras protein signal transduction	SinkSource+	0.002	19	110	689
GO:0007266	Rho protein signal transduction	SinkSource+	0	16	40	689
GO:0007346	regulation of mitotic cell cycle	SinkSource+	0	31	151	991
GO:0008017	microtubule binding	SinkSource+	0.011	10	64	338
GO:0008047	enzyme activator activity	SinkSource+	0	64	328	708
GO:0008094	DNA-dependent ATPase activity	SinkSource+	0.015	13	46	915
GO:0008121	ubiquinol-cytochrome-c reductase activity	SinkSource+	0.002	5	10	163
GO:0008134	transcription factor binding	SinkSource+	0	70	500	995
GO:0008135	translation factor activity, nucleic acid binding	SinkSource+	0	27	73	782
GO:0008137	NADH dehydrogenase (ubiquinone) activity	SinkSource+	0	28	44	173
GO:0008150	biological_process	SinkSource+	0	932	13449	992
GO:0008152	metabolic process	SinkSource+	0	341	5795	452
GO:0008156	negative regulation of DNA replication	SinkSource+	0.001	14	36	990
GO:0008159	positive transcription elongation factor activity	SinkSource+	0.02	4	6	254
GO:0008219	cell death	SinkSource+	0	77	629	991
GO:0008324	cation transmembrane transporter activity	SinkSource+	0.006	25	521	253
GO:0008334	histone mRNA metabolic process	SinkSource+	0.002	5	17	91
GO:0008380	RNA splicing	Both	0	76	281	103	0	42	275	103
GO:0008608	attachment of spindle microtubules to kinetochore	SinkSource+	0	5	5	281
GO:0008624	induction of apoptosis by extracellular signals	SinkSource+	0	45	109	956
GO:0009056	catabolic process	SinkSource+	0	100	941	761
GO:0009057	macromolecule catabolic process	SinkSource+	0	76	450	760
GO:0009058	biosynthetic process	SinkSource+	0	244	1523	998
GO:0009059	macromolecule biosynthetic process	SinkSource+	0	219	757	998
GO:0009141	nucleoside triphosphate metabolic process	SinkSource+	0.006	13	126	294
GO:0009142	nucleoside triphosphate biosynthetic process	SinkSource+	0.003	12	98	294
GO:0009144	purine nucleoside triphosphate metabolic process	SinkSource+	0.003	13	119	294
GO:0009145	purine nucleoside triphosphate biosynthetic process	SinkSource+	0.003	12	96	294
GO:0009150	purine ribonucleotide metabolic process	SinkSource+	0.013	13	133	294
GO:0009152	purine ribonucleotide biosynthetic process	SinkSource+	0.014	12	112	294
GO:0009199	ribonucleoside triphosphate metabolic process	SinkSource+	0.003	13	115	294
GO:0009201	ribonucleoside triphosphate biosynthetic process	SinkSource+	0.003	12	96	294
GO:0009205	purine ribonucleoside triphosphate metabolic process	SinkSource+	0.002	13	114	294
GO:0009206	purine ribonucleoside triphosphate biosynthetic process	SinkSource+	0.002	12	95	294
GO:0009259	ribonucleotide metabolic process	SinkSource+	0.036	13	144	294
GO:0009260	ribonucleotide biosynthetic process	SinkSource+	0.036	12	121	294
GO:0009303	rRNA transcription	SinkSource+	0	8	17	356
GO:0009304	tRNA transcription	SinkSource+	0.002	5	7	356
GO:0009452	RNA capping	SinkSource+	0	5	5	303
GO:0009889	regulation of biosynthetic process	SinkSource+	0	248	2911	998
GO:0009890	negative regulation of biosynthetic process	SinkSource+	0.005	67	594	990
GO:0009891	positive regulation of biosynthetic process	SinkSource+	0.027	74	712	985
GO:0009892	negative regulation of metabolic process	SinkSource+	0	131	818	990
GO:0009893	positive regulation of metabolic process	SinkSource+	0	134	983	994
GO:0009987	cellular process	SinkSource+	0	791	8849	986
GO:0010468	regulation of gene expression	SinkSource+	0	240	2785	998
GO:0010498	proteasomal protein catabolic process	Both	0.003	47	114	709	0.003	19	105	709
GO:0010556	regulation of macromolecule biosynthetic process	SinkSource+	0	241	2746	998
GO:0010557	positive regulation of macromolecule biosynthetic process	SinkSource+	0.02	70	656	985
GO:0010558	negative regulation of macromolecule biosynthetic process	SinkSource+	0.006	64	566	990
GO:0010564	regulation of cell cycle process	SinkSource+	0.001	27	131	991
GO:0010604	positive regulation of macromolecule metabolic process	SinkSource+	0	126	908	989
GO:0010605	negative regulation of macromolecule metabolic process	SinkSource+	0	127	766	990
GO:0010608	posttranscriptional regulation of gene expression	SinkSource+	0	42	216	958
GO:0010628	positive regulation of gene expression	SinkSource+	0.01	65	582	989
GO:0010639	negative regulation of organelle organization	SinkSource+	0.001	23	93	991
GO:0010860	proteasome regulator activity	SinkSource+	0.014	6	9	755
GO:0010941	regulation of cell death	SinkSource+	0	98	835	998
GO:0010942	positive regulation of cell death	SinkSource+	0	75	435	998
GO:0012501	programmed cell death	SinkSource+	0	68	509	976
GO:0012502	induction of programmed cell death	SinkSource+	0	65	316	998
GO:0015002	heme-copper terminal oxidase activity	SinkSource+	0	10	27	253
GO:0015030	Cajal body	SinkSource+	0	13	44	343
GO:0015077	monovalent inorganic cation transmembrane transporter activity	SinkSource+	0	25	106	253
GO:0015078	hydrogen ion transmembrane transporter activity	SinkSource+	0	25	91	253
GO:0015931	nucleobase, nucleoside, nucleotide and nucleic acid transport	SinkSource+	0	23	113	167
GO:0015934	large ribosomal subunit	SinkSource+	0	33	64	509
GO:0015935	small ribosomal subunit	SinkSource+	0	31	65	474
GO:0015985	energy coupled proton transport, down electrochemical gradient	SinkSource+	0	12	39	294
GO:0015986	ATP synthesis coupled proton transport	SinkSource+	0	12	39	294
GO:0015992	proton transport	SinkSource+	0	15	59	294
GO:0016043	cellular component organization	SinkSource+	0	283	2355	994
GO:0016070	RNA metabolic process	Both	0	90	912	107	0	82	861	107
GO:0016071	mRNA metabolic process	Both	0.002	70	360	100	0.002	41	350	100
GO:0016072	rRNA metabolic process	SinkSource+	0.002	16	105	474
GO:0016251	general RNA polymerase II transcription factor activity	Both	0	20	49	351	0	14	50	351
GO:0016265	death	SinkSource+	0	77	636	991
GO:0016281	eukaryotic translation initiation factor 4F complex	SinkSource+	0.02	6	9	782
GO:0016455	RNA polymerase II transcription mediator activity	Both	0	7	27	339	0	11	28	339
GO:0016462	pyrophosphatase activity	SinkSource+	0.025	64	696	826
GO:0016469	proton-transporting two-sector ATPase complex	SinkSource+	0	12	29	294
GO:0016491	oxidoreductase activity	SinkSource+	0	51	669	296
GO:0016563	transcription activator activity	SinkSource+	0.002	53	406	995
GO:0016567	protein ubiquitination	SinkSource+	0.023	25	144	978
GO:0016592	mediator complex	Both	0	9	29	339	0	11	29	339
GO:0016604	nuclear body	SinkSource+	0	45	191	949
GO:0016607	nuclear speck	SinkSource+	0	10	117	65
GO:0016651	oxidoreductase activity, acting on NADH or NADPH	SinkSource+	0	28	80	173
GO:0016655	oxidoreductase activity, acting on NADH or NADPH, quinone or similar compound as acceptor	SinkSource+	0	28	50	173
GO:0016675	oxidoreductase activity, acting on heme group of donors	SinkSource+	0	10	27	253
GO:0016676	oxidoreductase activity, acting on heme group of donors, oxygen as acceptor	SinkSource+	0	10	27	253
GO:0016679	oxidoreductase activity, acting on diphenols and related substances as donors	SinkSource+	0.002	5	11	163
GO:0016681	oxidoreductase activity, acting on diphenols and related substances as donors, cytochrome as acceptor	SinkSource+	0.002	5	10	163
GO:0016779	nucleotidyltransferase activity	SinkSource+	0	27	113	815
GO:0016817	hydrolase activity, acting on acid anhydrides	SinkSource+	0.034	64	703	826
GO:0016818	hydrolase activity, acting on acid anhydrides, in phosphorus-containing anhydrides	SinkSource+	0.03	64	699	826
GO:0017111	nucleoside-triphosphatase activity	SinkSource+	0.006	64	669	826
GO:0019213	deacetylase activity	SinkSource+	0.003	9	17	985
GO:0019219	regulation of nucleobase, nucleoside, nucleotide and nucleic acid metabolic process	SinkSource+	0.002	228	2735	998
GO:0019222	regulation of metabolic process	SinkSource+	0	337	3605	998
GO:0019538	protein metabolic process	SinkSource+	0	218	2414	985
GO:0019773	proteasome core complex, alpha-subunit complex	BKZ					0.043	5	8	985
GO:0019843	rRNA binding	SinkSource+	0	11	28	466
GO:0019866	organelle inner membrane	SinkSource+	0	61	277	308
GO:0019941	modification-dependent protein catabolic process	SinkSource+	0	51	245	759
GO:0022402	cell cycle process	SinkSource+	0	137	542	991
GO:0022403	cell cycle phase	SinkSource+	0	78	305	990
GO:0022411	cellular component disassembly	SinkSource+	0.023	9	38	473
GO:0022607	cellular component assembly	SinkSource+	0	151	912	994
GO:0022613	ribonucleoprotein complex biogenesis	SinkSource+	0	18	47	466
GO:0022618	ribonucleoprotein complex assembly	SinkSource+	0	38	87	711
GO:0022625	cytosolic large ribosomal subunit	SinkSource+	0	30	37	509
GO:0022627	cytosolic small ribosomal subunit	SinkSource+	0	31	41	474
GO:0022890	inorganic cation transmembrane transporter activity	SinkSource+	0	25	146	253
GO:0022900	electron transport chain	SinkSource+	0	37	116	173
GO:0022904	respiratory electron transport chain	SinkSource+	0	30	68	172
GO:0023034	intracellular signaling pathway	SinkSource+	0	104	972	933
GO:0030029	actin filament-based process	SinkSource+	0.003	28	232	660
GO:0030036	actin cytoskeleton organization	SinkSource+	0.002	28	218	660
GO:0030234	enzyme regulator activity	SinkSource+	0	104	810	735
GO:0030528	transcription regulator activity	SinkSource+	0.006	132	1448	1000
GO:0030529	ribonucleoprotein complex	SinkSource+	0	139	515	478
GO:0030530	heterogeneous nuclear ribonucleoprotein complex	SinkSource+	0	12	17	156
GO:0030532	small nuclear ribonucleoprotein complex	SinkSource+	0	15	38	76
GO:0030695	GTPase regulator activity	SinkSource+	0	87	387	652
GO:0030880	RNA polymerase complex	SinkSource+	0	11	26	347
GO:0030964	NADH dehydrogenase complex	SinkSource+	0	27	43	173
GO:0031090	organelle membrane	SinkSource+	0	73	1731	308
GO:0031123	RNA 3'-end processing	SinkSource+	0	11	27	91
GO:0031124	mRNA 3'-end processing	SinkSource+	0	11	17	91
GO:0031145	anaphase-promoting complex-dependent proteasomal ubiquitin-dependent protein catabolic process	Both	0	42	67	630	0	16	67	630
GO:0031262	Ndc80 complex	SinkSource+	0.002	4	4	277
GO:0031323	regulation of cellular metabolic process	SinkSource+	0	330	3448	998
GO:0031324	negative regulation of cellular metabolic process	SinkSource+	0	126	754	990
GO:0031325	positive regulation of cellular metabolic process	SinkSource+	0	128	939	994
GO:0031326	regulation of cellular biosynthetic process	SinkSource+	0	248	2889	998
GO:0031327	negative regulation of cellular biosynthetic process	SinkSource+	0.002	67	582	990
GO:0031328	positive regulation of cellular biosynthetic process	SinkSource+	0.028	73	700	985
GO:0031396	regulation of protein ubiquitination	SinkSource+	0	50	117	880
GO:0031397	negative regulation of protein ubiquitination	SinkSource+	0	45	78	759
GO:0031398	positive regulation of protein ubiquitination	SinkSource+	0	46	96	880
GO:0031399	regulation of protein modification process	SinkSource+	0	65	343	880
GO:0031400	negative regulation of protein modification process	SinkSource+	0	47	127	769
GO:0031401	positive regulation of protein modification process	SinkSource+	0	53	224	880
GO:0031570	DNA integrity checkpoint	SinkSource+	0.006	14	46	991
GO:0031577	spindle checkpoint	SinkSource+	0	10	15	991
GO:0031966	mitochondrial membrane	SinkSource+	0	64	368	308
GO:0031967	organelle envelope	SinkSource+	0	22	107	338
GO:0031975	envelope	SinkSource+	0	22	107	338
GO:0032200	telomere organization	SinkSource+	0.001	13	31	990
GO:0032205	negative regulation of telomere maintenance	SinkSource+	0.029	6	8	990
GO:0032268	regulation of cellular protein metabolic process	SinkSource+	0	106	541	985
GO:0032269	negative regulation of cellular protein metabolic process	SinkSource+	0	56	195	769
GO:0032270	positive regulation of cellular protein metabolic process	SinkSource+	0	57	284	880
GO:0032319	regulation of Rho GTPase activity	SinkSource+	0.002	10	29	569
GO:0032774	RNA biosynthetic process	SinkSource+	0	37	223	367
GO:0032991	macromolecular complex	Both	0	360	3083	478	0	228	3022	478
GO:0033043	regulation of organelle organization	SinkSource+	0.002	37	229	991
GO:0033170	protein-DNA loading ATPase activity	SinkSource+	0.031	4	4	546
GO:0033177	proton-transporting two-sector ATPase complex, proton-transporting domain	SinkSource+	0.001	8	23	294
GO:0033276	transcription factor TFTC complex	SinkSource+	0.001	8	13	613
GO:0033279	ribosomal subunit	SinkSource+	0	63	126	474
GO:0033554	cellular response to stress	SinkSource+	0	78	522	991
GO:0033558	protein deacetylase activity	SinkSource+	0.002	9	15	985
GO:0034062	RNA polymerase activity	Both	0	17	39	753	0	12	39	753
GO:0034220	ion transmembrane transport	SinkSource+	0	12	48	294
GO:0034453	microtubule anchoring	SinkSource+	0.011	5	11	281
GO:0034621	cellular macromolecular complex subunit organization	SinkSource+	0	51	380	474
GO:0034622	cellular macromolecular complex assembly	SinkSource+	0	42	341	442
GO:0034641	cellular nitrogen compound metabolic process	SinkSource+	0	343	2005	998
GO:0034645	cellular macromolecule biosynthetic process	SinkSource+	0	216	725	998
GO:0035023	regulation of Rho protein signal transduction	SinkSource+	0	35	76	680
GO:0042257	ribosomal subunit assembly	SinkSource+	0.002	5	5	474
GO:0042273	ribosomal large subunit biogenesis	SinkSource+	0.002	7	11	711
GO:0042274	ribosomal small subunit biogenesis	SinkSource+	0	9	12	711
GO:0042382	paraspeckles	SinkSource+	0.002	6	6	906
GO:0042776	mitochondrial ATP synthesis coupled proton transport	SinkSource+	0	11	14	294
GO:0042791	5S class rRNA transcription	SinkSource+	0.037	4	6	302
GO:0042797	tRNA transcription from RNA polymerase III promoter	SinkSource+	0.037	4	6	302
GO:0042809	vitamin D receptor binding	SinkSource+	0.001	9	14	881
GO:0042981	regulation of apoptosis	SinkSource+	0	97	822	998
GO:0043065	positive regulation of apoptosis	SinkSource+	0	75	432	998
GO:0043067	regulation of programmed cell death	SinkSource+	0	97	831	998
GO:0043068	positive regulation of programmed cell death	SinkSource+	0	75	434	998
GO:0043085	positive regulation of catalytic activity	SinkSource+	0	80	533	961
GO:0043086	negative regulation of catalytic activity	SinkSource+	0	45	290	630
GO:0043088	regulation of Cdc42 GTPase activity	SinkSource+	0.013	6	11	569
GO:0043161	proteasomal ubiquitin-dependent protein catabolic process	Both	0.003	47	114	709	0.003	19	105	709
GO:0043170	macromolecule metabolic process	Both	0	504	3813	991	0	289	3952	991
GO:0043226	organelle	SinkSource+	0	414	8388	450
GO:0043227	membrane-bounded organelle	Both	0.003	322	7671	347	0.003	473	7451	347
GO:0043228	non-membrane-bounded organelle	SinkSource+	0	163	1738	496
GO:0043229	intracellular organelle	SinkSource+	0	414	8375	450
GO:0043231	intracellular membrane-bounded organelle	Both	0.003	322	7669	347	0.003	473	7449	347
GO:0043232	intracellular non-membrane-bounded organelle	SinkSource+	0	163	1738	496
GO:0043234	protein complex	Both	0.002	206	2483	357	0.002	182	2429	357
GO:0043566	structure-specific DNA binding	SinkSource+	0.029	23	138	897
GO:0043631	RNA polyadenylation	SinkSource+	0	6	13	62
GO:0043632	modification-dependent macromolecule catabolic process	SinkSource+	0	51	245	759
GO:0043933	macromolecular complex subunit organization	SinkSource+	0	81	747	356
GO:0044085	cellular component biogenesis	SinkSource+	0	19	52	466
GO:0044092	negative regulation of molecular function	SinkSource+	0	63	360	990
GO:0044093	positive regulation of molecular function	SinkSource+	0	84	608	961
GO:0044237	cellular metabolic process	Both	0	601	4784	1000	0	334	4910	1000
GO:0044238	primary metabolic process	Both	0	543	5048	1000	0	341	5058	1000
GO:0044248	cellular catabolic process	SinkSource+	0	97	714	761
GO:0044249	cellular biosynthetic process	SinkSource+	0	238	1403	998
GO:0044260	cellular macromolecule metabolic process	Both	0	499	3300	1000	0	266	3476	1000
GO:0044265	cellular macromolecule catabolic process	Both	0.027	76	380	760	0.027	71	782	760
GO:0044267	cellular protein metabolic process	SinkSource+	0	175	1795	991
GO:0044419	interspecies interaction between organisms	SinkSource+	0	55	315	881
GO:0044422	organelle part	Both	0	618	4753	991	0	281	4011	991
GO:0044424	intracellular part	SinkSource+	0	895	10513	992
GO:0044427	chromosomal part	SinkSource+	0	104	413	990
GO:0044428	nuclear part	Both	0	378	1725	991	0	155	1665	991
GO:0044429	mitochondrial part	SinkSource+	0	70	610	296
GO:0044431	Golgi apparatus part	BKZ					0.026	33	272	296
GO:0044444	cytoplasmic part	SinkSource+	0	436	4965	983
GO:0044445	cytosolic part	SinkSource+	0	60	143	474
GO:0044446	intracellular organelle part	Both	0	618	4724	991	0	279	3985	991
GO:0044451	nucleoplasm part	Both	0	129	572	1000	0	61	551	1000
GO:0044454	nuclear chromosome part	SinkSource+	0	41	125	990
GO:0044455	mitochondrial membrane part	SinkSource+	0	50	132	308
GO:0044464	cell part	SinkSource+	0	667	14283	688
GO:0045257	succinate dehydrogenase complex (ubiquinone)	SinkSource+	0.025	4	5	350
GO:0045259	proton-transporting ATP synthase complex	SinkSource+	0	12	17	294
GO:0045261	proton-transporting ATP synthase complex, catalytic core F(1)	SinkSource+	0	5	5	293
GO:0045263	proton-transporting ATP synthase complex, coupling factor F(o)	SinkSource+	0	8	14	294
GO:0045271	respiratory chain complex I	SinkSource+	0	27	43	173
GO:0045281	succinate dehydrogenase complex	SinkSource+	0.025	4	5	350
GO:0045283	fumarate reductase complex	SinkSource+	0.025	4	5	350
GO:0045333	cellular respiration	SinkSource+	0.011	7	25	350
GO:0045934	negative regulation of nucleobase, nucleoside, nucleotide and nucleic acid metabolic process	SinkSource+	0.001	65	527	990
GO:0045935	positive regulation of nucleobase, nucleoside, nucleotide and nucleic acid metabolic process	SinkSource+	0.01	69	634	985
GO:0045941	positive regulation of transcription	SinkSource+	0.01	63	558	985
GO:0046034	ATP metabolic process	SinkSource+	0.002	13	101	294
GO:0046578	regulation of Ras protein signal transduction	SinkSource+	0	35	118	680
GO:0046907	intracellular transport	SinkSource+	0.001	75	637	982
GO:0046930	pore complex	SinkSource+	0	23	76	938
GO:0046966	thyroid hormone receptor binding	SinkSource+	0.025	8	23	613
GO:0048285	organelle fission	SinkSource+	0	48	199	701
GO:0048518	positive regulation of biological process	SinkSource+	0	225	2114	998
GO:0048519	negative regulation of biological process	SinkSource+	0	194	1884	991
GO:0048522	positive regulation of cellular process	SinkSource+	0	218	1927	998
GO:0048523	negative regulation of cellular process	SinkSource+	0	184	1726	998
GO:0050136	NADH dehydrogenase (quinone) activity	SinkSource+	0	28	44	173
GO:0050657	nucleic acid transport	Both	0.005	23	98	167	0.005	18	99	167
GO:0050658	RNA transport	Both	0.005	23	98	167	0.005	18	99	167
GO:0050789	regulation of biological process	SinkSource+	0	517	6591	998
GO:0050790	regulation of catalytic activity	SinkSource+	0	117	867	990
GO:0050794	regulation of cellular process	SinkSource+	0	503	6212	998
GO:0051028	mRNA transport	Both	0.004	22	87	167	0.004	17	88	167
GO:0051052	regulation of DNA metabolic process	SinkSource+	0.006	24	127	990
GO:0051053	negative regulation of DNA metabolic process	SinkSource+	0	18	48	990
GO:0051056	regulation of small GTPase mediated signal transduction	SinkSource+	0	35	160	680
GO:0051128	regulation of cellular component organization	SinkSource+	0.002	61	505	991
GO:0051129	negative regulation of cellular component organization	SinkSource+	0	32	164	991
GO:0051168	nuclear export	SinkSource+	0	19	60	919
GO:0051169	nuclear transport	SinkSource+	0	33	121	982
GO:0051171	regulation of nitrogen compound metabolic process	SinkSource+	0.001	230	2761	998
GO:0051172	negative regulation of nitrogen compound metabolic process	SinkSource+	0.002	65	535	990
GO:0051173	positive regulation of nitrogen compound metabolic process	SinkSource+	0.01	71	653	994
GO:0051234	establishment of localization	SinkSource+	0	72	2547	178
GO:0051236	establishment of RNA localization	Both	0.005	23	98	167	0.005	18	99	167
GO:0051246	regulation of protein metabolic process	SinkSource+	0	108	600	985
GO:0051247	positive regulation of protein metabolic process	SinkSource+	0	58	294	880
GO:0051248	negative regulation of protein metabolic process	SinkSource+	0	56	202	769
GO:0051276	chromosome organization	SinkSource+	0.003	62	525	990
GO:0051301	cell division	SinkSource+	0	81	308	990
GO:0051303	establishment of chromosome localization	SinkSource+	0.009	8	15	930
GO:0051310	metaphase plate congression	SinkSource+	0.027	7	12	930
GO:0051313	attachment of spindle microtubules to chromosome	SinkSource+	0	5	5	281
GO:0051322	anaphase	SinkSource+	0.001	6	7	592
GO:0051340	regulation of ligase activity	Both	0.002	48	88	880	0.002	17	85	880
GO:0051351	positive regulation of ligase activity	Both	0	45	77	880	0	17	75	880
GO:0051352	negative regulation of ligase activity	Both	0	42	70	630	0	16	69	630
GO:0051383	kinetochore organization	SinkSource+	0.002	4	4	232
GO:0051436	negative regulation of ubiquitin-protein ligase activity during mitotic cell cycle	Both	0	42	66	630	0	16	66	630
GO:0051437	positive regulation of ubiquitin-protein ligase activity during mitotic cell cycle	Both	0	45	69	880	0	17	69	880
GO:0051438	regulation of ubiquitin-protein ligase activity	Both	0	48	85	880	0	17	82	880
GO:0051439	regulation of ubiquitin-protein ligase activity during mitotic cell cycle	Both	0	48	72	880	0	17	72	880
GO:0051443	positive regulation of ubiquitin-protein ligase activity	Both	0	45	74	880	0	17	72	880
GO:0051444	negative regulation of ubiquitin-protein ligase activity	Both	0	42	70	630	0	16	69	630
GO:0051603	proteolysis involved in cellular protein catabolic process	SinkSource+	0	61	271	978
GO:0051649	establishment of localization in cell	SinkSource+	0	92	819	982
GO:0051656	establishment of organelle localization	SinkSource+	0	17	45	930
GO:0051704	multi-organism process	SinkSource+	0.002	37	638	357
GO:0051716	cellular response to stimulus	SinkSource+	0	91	775	991
GO:0051726	regulation of cell cycle	SinkSource+	0	68	344	998
GO:0051783	regulation of nuclear division	SinkSource+	0.018	15	57	991
GO:0055029	nuclear DNA-directed RNA polymerase complex	Both	0.045	11	25	347	0.045	8	24	347
GO:0055085	transmembrane transport	SinkSource+	0.002	23	550	178
GO:0055114	oxidation reduction	SinkSource+	0	38	629	177
GO:0060255	regulation of macromolecule metabolic process	SinkSource+	0	315	3218	998
GO:0060589	nucleoside-triphosphatase regulator activity	SinkSource+	0	87	395	652
GO:0065003	macromolecular complex assembly	SinkSource+	0	76	701	356
GO:0065007	biological regulation	SinkSource+	0	531	7004	998
GO:0065009	regulation of molecular function	SinkSource+	0	128	1011	990
GO:0070003	threonine-type peptidase activity	SinkSource+	0	10	19	322
GO:0070461	SAGA-type complex	SinkSource+	0.002	9	22	637
GO:0070469	respiratory chain	SinkSource+	0	40	71	235
GO:0070925	organelle assembly	SinkSource+	0.002	15	51	968
GO:0070979	protein K11-linked ubiquitination	SinkSource+	0	9	15	630
GO:0071173	spindle assembly checkpoint	SinkSource+	0.003	8	13	991
GO:0071174	mitotic cell cycle spindle checkpoint	SinkSource+	0.036	7	12	991
GO:0080090	regulation of primary metabolic process	SinkSource+	0	318	3254	998
GO:0090304	nucleic acid metabolic process	SinkSource+	0	314	1391	998
GO:0090305	nucleic acid phosphodiester bond hydrolysis	SinkSource+	0	7	41	82
