# Supplementary material for: Network-Based Prediction and Analysis of HIV Dependency Factors
Source: PLoS Comput Biol. 2011 Sep 22;7(9):e1002164. doi: 10.1371/journal.pcbi.1002164 (PMC3178628; doi:10.1371/journal.pcbi.1002164)
Supplement: Table S4 — Comparison of FuncAssociate results between HDFs predicted by SinkSource+ and by SinkSource. Columns are similar to those in Table S3, except that this table compares FuncAssociate results for SinkSource+ with FuncAssociate results for SinkSource. (XLS) [file pcbi.1002164.s014.xls]

## Sheet: supplementary-table-4
GO id	GO term	Enriched in	p-value (SinkSource+)	N (SinkSource+)	X (SinkSource+)	M (SinkSource+)	p-value (SinkSource)	N (SinkSource)	X (SinkSource)	M (SinkSource)
GO:0000028	ribosomal small subunit assembly	SinkSource+	0.014	4	4	474
GO:0000075	cell cycle checkpoint	SinkSource+	0	35	86	991
GO:0000090	mitotic anaphase	SinkSource+	0.001	6	7	592
GO:0000104	succinate dehydrogenase activity	SinkSource+	0.025	4	5	350
GO:0000118	histone deacetylase complex	SinkSource+	0.001	14	36	987
GO:0000127	transcription factor TFIIIC complex	SinkSource+	0.037	4	6	302
GO:0000152	nuclear ubiquitin ligase complex	SinkSource+	0.001	12	27	848
GO:0000166	nucleotide binding	Both	0	209	2169	981	0	80	2169	981
GO:0000226	microtubule cytoskeleton organization	SinkSource+	0.001	15	122	290
GO:0000245	spliceosome assembly	Both	0.003	5	25	68	0.003	8	25	68
GO:0000275	mitochondrial proton-transporting ATP synthase complex, catalytic core F(1)	Both	0.001	4	4	293	0.001	4	4	293
GO:0000276	mitochondrial proton-transporting ATP synthase complex, coupling factor F(o)	Both	0	6	8	231	0	6	8	231
GO:0000280	nuclear division	Both	0.029	48	191	701	0.029	30	191	701
GO:0000339	RNA cap binding	SinkSource+	0.02	6	9	782
GO:0000375	RNA splicing, via transesterification reactions	Both	0	21	63	137	0	23	63	137
GO:0000377	RNA splicing, via transesterification reactions with bulged adenosine as nucleophile	Both	0	16	50	137	0	18	50	137
GO:0000387	spliceosomal snRNP assembly	Both	0	17	32	343	0	16	32	343
GO:0000398	nuclear mRNA splicing, via spliceosome	Both	0	16	50	137	0	18	50	137
GO:0000428	DNA-directed RNA polymerase complex	Both	0	11	25	347	0	11	25	347
GO:0000444	MIS12/MIND type complex	SinkSource+	0.002	4	4	273
GO:0000502	proteasome complex	Both	0	27	55	415	0	25	55	415
GO:0000718	nucleotide-excision repair, DNA damage removal	SinkSource+	0	15	22	676
GO:0000723	telomere maintenance	SinkSource+	0.001	13	30	990
GO:0000775	chromosome, centromeric region	Both	0.012	18	53	291	0.012	15	53	291
GO:0000776	kinetochore	Both	0	35	66	338	0	26	66	338
GO:0000777	condensed chromosome kinetochore	Both	0	33	50	338	0	25	50	338
GO:0000779	condensed chromosome, centromeric region	SinkSource+	0.001	6	11	291
GO:0000780	condensed nuclear chromosome, centromeric region	SinkSource+	0.002	7	9	931
GO:0000781	chromosome, telomeric region	SinkSource+	0.002	12	28	990
GO:0000808	origin recognition complex	SinkSource+	0.001	7	8	876
GO:0002504	antigen processing and presentation of peptide or polysaccharide antigen via MHC class II	SinkSource+	0.031	9	22	922
GO:0003674	molecular_function	Both	0	936	14379	992	0	804	14379	992
GO:0003676	nucleic acid binding	Both	0	374	3113	992	0	234	3113	992
GO:0003677	DNA binding	SinkSource+	0	198	2224	998
GO:0003684	damaged DNA binding	SinkSource+	0.022	13	45	954
GO:0003688	DNA replication origin binding	SinkSource+	0.003	6	7	876
GO:0003689	DNA clamp loader activity	SinkSource+	0.031	4	4	546
GO:0003697	single-stranded DNA binding	SinkSource+	0	17	54	897
GO:0003702	RNA polymerase II transcription factor activity	SinkSource+	0	24	242	351
GO:0003707	steroid hormone receptor activity	SinkSource+	0.003	14	45	992
GO:0003711	transcription elongation regulator activity	SinkSource+	0.011	6	20	268
GO:0003712	transcription cofactor activity	SinkSource+	0.001	50	351	995
GO:0003713	transcription coactivator activity	Both	0.032	35	207	995	0.032	5	207	995
GO:0003723	RNA binding	Both	0	162	718	763	0	162	718	763
GO:0003729	mRNA binding	Both	0	16	71	937	0	19	71	937
GO:0003735	structural constituent of ribosome	Both	0	72	157	478	0	73	157	478
GO:0003743	translation initiation factor activity	Both	0	19	39	782	0	18	39	782
GO:0003824	catalytic activity	SinkSource					0	78	4885	782
GO:0003899	DNA-directed RNA polymerase activity	Both	0	17	39	753	0	13	39	753
GO:0003954	NADH dehydrogenase activity	Both	0	28	44	173	0	29	44	173
GO:0004129	cytochrome-c oxidase activity	Both	0	10	27	253	0	10	27	253
GO:0004298	threonine-type endopeptidase activity	Both	0	10	19	322	0	10	19	322
GO:0004407	histone deacetylase activity	SinkSource+	0.002	9	15	985
GO:0004879	ligand-dependent nuclear receptor activity	SinkSource+	0.002	15	48	992
GO:0005083	small GTPase regulator activity	Both	0	56	269	652	0	50	269	652
GO:0005085	guanyl-nucleotide exchange factor activity	Both	0	35	138	680	0	30	138	680
GO:0005088	Ras guanyl-nucleotide exchange factor activity	Both	0	33	83	680	0	26	83	680
GO:0005089	Rho guanyl-nucleotide exchange factor activity	Both	0	32	69	680	0	25	69	680
GO:0005092	GDP-dissociation inhibitor activity	SinkSource+	0.002	6	7	610
GO:0005096	GTPase activator activity	Both	0	58	217	647	0	54	217	647
GO:0005099	Ras GTPase activator activity	SinkSource+	0.001	19	94	680
GO:0005100	Rho GTPase activator activity	Both	0	17	27	680	0	14	27	680
GO:0005198	structural molecule activity	Both	0	75	572	478	0	89	572	478
GO:0005215	transporter activity	SinkSource					0	27	1122	478
GO:0005488	binding	Both	0.004	842	11782	992	0.004	771	11782	992
GO:0005515	protein binding	Both	0	732	7839	999	0	600	7839	999
GO:0005575	cellular_component	SinkSource+	0	690	15304	711
GO:0005622	intracellular	Both	0	184	1807	660	0	186	1807	660
GO:0005634	nucleus	Both	0	540	4841	992	0	209	4841	992
GO:0005635	nuclear envelope	Both	0.005	17	93	338	0.005	8	93	338
GO:0005643	nuclear pore	Both	0	23	60	938	0	17	60	938
GO:0005654	nucleoplasm	Both	0	196	488	991	0	78	488	991
GO:0005658	alpha DNA polymerase:primase complex	SinkSource+	0.006	5	5	815
GO:0005663	DNA replication factor C complex	SinkSource+	0.003	5	5	732
GO:0005665	DNA-directed RNA polymerase II, core complex	SinkSource+	0.001	5	14	75
GO:0005667	transcription factor complex	SinkSource+	0	28	191	356
GO:0005669	transcription factor TFIID complex	Both	0.004	13	18	613	0.004	9	18	613
GO:0005675	holo TFIIH complex	SinkSource+	0.001	6	10	325
GO:0005680	anaphase-promoting complex	SinkSource+	0	11	23	692
GO:0005681	spliceosomal complex	Both	0	36	143	100	0	42	143	100
GO:0005683	U7 snRNP	Both	0	6	10	76	0	6	10	76
GO:0005694	chromosome	SinkSource+	0	43	243	864
GO:0005730	nucleolus	SinkSource+	0.011	47	445	823
GO:0005736	DNA-directed RNA polymerase I complex	SinkSource+	0.004	4	4	347
GO:0005737	cytoplasm	Both	0	396	4349	999	0	335	4349	999
GO:0005739	mitochondrion	Both	0	74	1221	296	0	60	1221	296
GO:0005743	mitochondrial inner membrane	Both	0	61	255	308	0	51	255	308
GO:0005746	mitochondrial respiratory chain	Both	0.015	5	15	235	0.015	5	15	235
GO:0005747	mitochondrial respiratory chain complex I	Both	0	27	43	173	0	28	43	173
GO:0005749	mitochondrial respiratory chain complex II	SinkSource+	0.025	4	5	350
GO:0005753	mitochondrial proton-transporting ATP synthase complex	Both	0	12	17	294	0	12	17	294
GO:0005819	spindle	SinkSource+	0	23	82	991
GO:0005829	cytosol	Both	0	252	1233	999	0	186	1233	999
GO:0005838	proteasome regulatory particle	Both	0	7	8	323	0	7	8	323
GO:0005839	proteasome core complex	Both	0	10	13	322	0	10	13	322
GO:0005840	ribosome	Both	0	73	188	478	0	73	188	478
GO:0005852	eukaryotic translation initiation factor 3 complex	Both	0	11	14	700	0	11	14	700
GO:0005876	spindle microtubule	SinkSource+	0.001	13	31	930
GO:0006091	generation of precursor metabolites and energy	Both	0	50	257	308	0	44	257	308
GO:0006119	oxidative phosphorylation	Both	0.005	5	10	293	0.005	5	10	293
GO:0006120	mitochondrial electron transport, NADH to ubiquinone	Both	0	26	43	172	0	26	43	172
GO:0006122	mitochondrial electron transport, ubiquinol to cytochrome c	Both	0.005	4	8	157	0.005	4	8	157
GO:0006139	nucleobase, nucleoside, nucleotide and nucleic acid metabolic process	Both	0	337	1721	998	0	145	1721	998
GO:0006259	DNA metabolic process	SinkSource+	0	104	494	991
GO:0006260	DNA replication	SinkSource+	0	62	169	990
GO:0006270	DNA replication initiation	SinkSource+	0	14	16	970
GO:0006275	regulation of DNA replication	SinkSource+	0.027	17	74	990
GO:0006281	DNA repair	SinkSource+	0	54	271	991
GO:0006283	transcription-coupled nucleotide-excision repair	SinkSource+	0.032	4	6	284
GO:0006289	nucleotide-excision repair	SinkSource+	0.001	9	29	366
GO:0006297	nucleotide-excision repair, DNA gap filling	SinkSource+	0	14	16	732
GO:0006308	DNA catabolic process	SinkSource+	0.001	16	60	722
GO:0006310	DNA recombination	SinkSource+	0.003	22	104	991
GO:0006350	transcription	Both	0.001	43	276	367	0.001	40	276	367
GO:0006351	transcription, DNA-dependent	Both	0.022	37	219	367	0.022	32	219	367
GO:0006352	transcription initiation	Both	0	38	95	356	0	34	95	356
GO:0006354	RNA elongation	Both	0	32	52	344	0	28	52	344
GO:0006364	rRNA processing	Both	0.001	16	101	474	0.001	23	101	474
GO:0006366	transcription from RNA polymerase II promoter	SinkSource+	0	25	177	351
GO:0006367	transcription initiation from RNA polymerase II promoter	Both	0	33	79	344	0	27	79	344
GO:0006368	RNA elongation from RNA polymerase II promoter	Both	0	31	48	344	0	27	48	344
GO:0006370	mRNA capping	Both	0.004	4	4	82	0.004	4	4	82
GO:0006376	mRNA splice site selection	Both	0.004	5	15	97	0.004	6	15	97
GO:0006378	mRNA polyadenylation	Both	0	6	10	62	0	6	10	62
GO:0006379	mRNA cleavage	Both	0	7	11	82	0	8	11	82
GO:0006383	transcription from RNA polymerase III promoter	Both	0	11	19	356	0	11	19	356
GO:0006396	RNA processing	Both	0	82	560	103	0	97	560	103
GO:0006397	mRNA processing	Both	0	67	299	100	0	79	299	100
GO:0006398	histone mRNA 3'-end processing	Both	0	5	6	91	0	5	6	91
GO:0006405	RNA export from nucleus	Both	0	15	43	765	0	11	43	765
GO:0006412	translation	Both	0	71	210	474	0	73	210	474
GO:0006413	translational initiation	Both	0	25	41	589	0	27	41	589
GO:0006414	translational elongation	Both	0	80	102	666	0	76	102	666
GO:0006417	regulation of translation	Both	0	30	149	937	0	36	149	937
GO:0006446	regulation of translational initiation	Both	0	17	44	782	0	22	44	782
GO:0006461	protein complex assembly	Both	0.001	51	493	356	0.001	58	493	356
GO:0006497	protein amino acid lipidation	SinkSource					0	13	41	356
GO:0006505	GPI anchor metabolic process	SinkSource					0	12	23	356
GO:0006506	GPI anchor biosynthetic process	SinkSource					0	11	22	356
GO:0006511	ubiquitin-dependent protein catabolic process	Both	0	51	240	759	0	24	240	759
GO:0006644	phospholipid metabolic process	SinkSource					0.033	18	178	759
GO:0006650	glycerophospholipid metabolic process	SinkSource					0	18	108	759
GO:0006754	ATP biosynthetic process	Both	0	12	85	294	0	12	85	294
GO:0006807	nitrogen compound metabolic process	Both	0	343	2120	998	0	155	2120	998
GO:0006810	transport	Both	0	72	2517	178	0	65	2517	178
GO:0006818	hydrogen transport	Both	0	15	61	294	0	15	61	294
GO:0006839	mitochondrial transport	Both	0	14	68	294	0	14	68	294
GO:0006913	nucleocytoplasmic transport	Both	0	33	120	982	0	28	120	982
GO:0006915	apoptosis	SinkSource+	0	66	498	967
GO:0006917	induction of apoptosis	SinkSource+	0	65	315	998
GO:0006974	response to DNA damage stimulus	SinkSource+	0	64	354	991
GO:0006996	organelle organization	SinkSource+	0	162	1273	990
GO:0007010	cytoskeleton organization	SinkSource+	0	48	401	660
GO:0007017	microtubule-based process	SinkSource+	0.011	18	221	338
GO:0007049	cell cycle	SinkSource+	0	110	482	991
GO:0007051	spindle organization	SinkSource+	0.036	13	48	935
GO:0007052	mitotic spindle organization	SinkSource+	0.01	8	15	935
GO:0007059	chromosome segregation	Both	0	31	54	799	0	21	54	799
GO:0007067	mitosis	Both	0.029	48	191	701	0.029	30	191	701
GO:0007080	mitotic metaphase plate congression	SinkSource+	0.01	7	11	930
GO:0007088	regulation of mitosis	SinkSource+	0.018	15	57	991
GO:0007093	mitotic cell cycle checkpoint	SinkSource+	0	18	39	991
GO:0007264	small GTPase mediated signal transduction	Both	0.004	42	283	710	0.004	41	283	710
GO:0007265	Ras protein signal transduction	SinkSource+	0.002	19	110	689
GO:0007266	Rho protein signal transduction	Both	0.001	16	40	689	0.001	14	40	689
GO:0007346	regulation of mitotic cell cycle	SinkSource+	0	31	151	991
GO:0008017	microtubule binding	SinkSource+	0.011	10	64	338
GO:0008047	enzyme activator activity	Both	0	64	328	708	0	59	328	708
GO:0008094	DNA-dependent ATPase activity	SinkSource+	0.015	13	46	915
GO:0008121	ubiquinol-cytochrome-c reductase activity	Both	0	5	10	163	0	5	10	163
GO:0008134	transcription factor binding	SinkSource+	0	70	500	995
GO:0008135	translation factor activity, nucleic acid binding	Both	0	27	73	782	0	25	73	782
GO:0008137	NADH dehydrogenase (ubiquinone) activity	Both	0	28	44	173	0	29	44	173
GO:0008150	biological_process	Both	0	932	13449	992	0	770	13449	992
GO:0008152	metabolic process	Both	0	341	5795	452	0	428	5795	452
GO:0008156	negative regulation of DNA replication	SinkSource+	0.001	14	36	990
GO:0008159	positive transcription elongation factor activity	SinkSource+	0.02	4	6	254
GO:0008219	cell death	SinkSource+	0	77	629	991
GO:0008324	cation transmembrane transporter activity	Both	0	25	521	253	0	21	521	253
GO:0008334	histone mRNA metabolic process	Both	0.027	5	17	91	0.027	5	17	91
GO:0008380	RNA splicing	Both	0	76	281	103	0	87	281	103
GO:0008494	translation activator activity	SinkSource					0.004	5	8	103
GO:0008608	attachment of spindle microtubules to kinetochore	SinkSource+	0	5	5	281
GO:0008624	induction of apoptosis by extracellular signals	Both	0	45	109	956	0	29	109	956
GO:0009056	catabolic process	Both	0.02	100	941	761	0.02	52	941	761
GO:0009057	macromolecule catabolic process	Both	0	76	450	760	0	29	450	760
GO:0009058	biosynthetic process	Both	0	244	1523	998	0	162	1523	998
GO:0009059	macromolecule biosynthetic process	Both	0	219	757	998	0	123	757	998
GO:0009081	branched chain family amino acid metabolic process	SinkSource					0.05	8	17	998
GO:0009141	nucleoside triphosphate metabolic process	Both	0.004	13	126	294	0.004	13	126	294
GO:0009142	nucleoside triphosphate biosynthetic process	Both	0.001	12	98	294	0.001	12	98	294
GO:0009144	purine nucleoside triphosphate metabolic process	Both	0.001	13	119	294	0.001	13	119	294
GO:0009145	purine nucleoside triphosphate biosynthetic process	Both	0.001	12	96	294	0.001	12	96	294
GO:0009150	purine ribonucleotide metabolic process	Both	0.005	13	133	294	0.005	13	133	294
GO:0009152	purine ribonucleotide biosynthetic process	Both	0.005	12	112	294	0.005	12	112	294
GO:0009199	ribonucleoside triphosphate metabolic process	Both	0.001	13	115	294	0.001	13	115	294
GO:0009201	ribonucleoside triphosphate biosynthetic process	Both	0.001	12	96	294	0.001	12	96	294
GO:0009205	purine ribonucleoside triphosphate metabolic process	Both	0.001	13	114	294	0.001	13	114	294
GO:0009206	purine ribonucleoside triphosphate biosynthetic process	Both	0.001	12	95	294	0.001	12	95	294
GO:0009259	ribonucleotide metabolic process	Both	0.015	13	144	294	0.015	13	144	294
GO:0009260	ribonucleotide biosynthetic process	Both	0.015	12	121	294	0.015	12	121	294
GO:0009303	rRNA transcription	Both	0.033	8	17	356	0.033	8	17	356
GO:0009304	tRNA transcription	SinkSource+	0.002	5	7	356
GO:0009452	RNA capping	Both	0	5	5	303	0	5	5	303
GO:0009889	regulation of biosynthetic process	SinkSource+	0	248	2911	998
GO:0009890	negative regulation of biosynthetic process	SinkSource+	0.005	67	594	990
GO:0009891	positive regulation of biosynthetic process	SinkSource+	0.027	74	712	985
GO:0009892	negative regulation of metabolic process	Both	0.03	131	818	990	0.03	67	818	990
GO:0009893	positive regulation of metabolic process	SinkSource+	0	134	983	994
GO:0009987	cellular process	Both	0	791	8849	986	0	519	8849	986
GO:0010468	regulation of gene expression	SinkSource+	0	240	2785	998
GO:0010498	proteasomal protein catabolic process	Both	0	47	114	709	0	23	114	709
GO:0010556	regulation of macromolecule biosynthetic process	SinkSource+	0	241	2746	998
GO:0010557	positive regulation of macromolecule biosynthetic process	SinkSource+	0.02	70	656	985
GO:0010558	negative regulation of macromolecule biosynthetic process	SinkSource+	0.006	64	566	990
GO:0010564	regulation of cell cycle process	SinkSource+	0.001	27	131	991
GO:0010604	positive regulation of macromolecule metabolic process	SinkSource+	0	126	908	989
GO:0010605	negative regulation of macromolecule metabolic process	SinkSource+	0	127	766	990
GO:0010608	posttranscriptional regulation of gene expression	Both	0	42	216	958	0	45	216	958
GO:0010628	positive regulation of gene expression	SinkSource+	0.01	65	582	989
GO:0010639	negative regulation of organelle organization	SinkSource+	0.001	23	93	991
GO:0010860	proteasome regulator activity	Both	0.023	6	9	755	0.023	6	9	755
GO:0010941	regulation of cell death	SinkSource+	0	98	835	998
GO:0010942	positive regulation of cell death	SinkSource+	0	75	435	998
GO:0012501	programmed cell death	SinkSource+	0	68	509	976
GO:0012502	induction of programmed cell death	SinkSource+	0	65	316	998
GO:0015002	heme-copper terminal oxidase activity	Both	0	10	27	253	0	10	27	253
GO:0015030	Cajal body	Both	0	13	44	343	0	12	44	343
GO:0015075	ion transmembrane transporter activity	SinkSource					0	21	689	343
GO:0015077	monovalent inorganic cation transmembrane transporter activity	Both	0	25	106	253	0	22	106	253
GO:0015078	hydrogen ion transmembrane transporter activity	Both	0	25	91	253	0	22	91	253
GO:0015931	nucleobase, nucleoside, nucleotide and nucleic acid transport	Both	0	23	113	167	0	43	113	167
GO:0015934	large ribosomal subunit	Both	0	33	64	509	0	33	64	509
GO:0015935	small ribosomal subunit	Both	0	31	65	474	0	32	65	474
GO:0015985	energy coupled proton transport, down electrochemical gradient	Both	0	12	39	294	0	12	39	294
GO:0015986	ATP synthesis coupled proton transport	Both	0	12	39	294	0	12	39	294
GO:0015992	proton transport	Both	0	15	59	294	0	15	59	294
GO:0016043	cellular component organization	Both	0.016	283	2355	994	0.016	194	2355	994
GO:0016070	RNA metabolic process	Both	0	90	912	107	0	206	912	107
GO:0016071	mRNA metabolic process	Both	0	70	360	100	0	83	360	100
GO:0016072	rRNA metabolic process	Both	0.001	16	105	474	0.001	23	105	474
GO:0016251	general RNA polymerase II transcription factor activity	Both	0	20	49	351	0	19	49	351
GO:0016254	preassembly of GPI anchor in ER membrane	SinkSource					0	15	16	351
GO:0016265	death	SinkSource+	0	77	636	991
GO:0016281	eukaryotic translation initiation factor 4F complex	SinkSource+	0.02	6	9	782
GO:0016455	RNA polymerase II transcription mediator activity	Both	0	7	27	339	0	4	27	339
GO:0016462	pyrophosphatase activity	SinkSource+	0.025	64	696	826
GO:0016469	proton-transporting two-sector ATPase complex	Both	0	12	29	294	0	12	29	294
GO:0016491	oxidoreductase activity	Both	0	51	669	296	0	47	669	296
GO:0016563	transcription activator activity	SinkSource+	0.002	53	406	995
GO:0016567	protein ubiquitination	SinkSource+	0.023	25	144	978
GO:0016592	mediator complex	Both	0	9	29	339	0	5	29	339
GO:0016604	nuclear body	Both	0	45	191	949	0	40	191	949
GO:0016607	nuclear speck	Both	0	10	117	65	0	25	117	65
GO:0016651	oxidoreductase activity, acting on NADH or NADPH	Both	0	28	80	173	0	28	80	173
GO:0016655	oxidoreductase activity, acting on NADH or NADPH, quinone or similar compound as acceptor	Both	0	28	50	173	0	28	50	173
GO:0016675	oxidoreductase activity, acting on heme group of donors	Both	0	10	27	253	0	10	27	253
GO:0016676	oxidoreductase activity, acting on heme group of donors, oxygen as acceptor	Both	0	10	27	253	0	10	27	253
GO:0016679	oxidoreductase activity, acting on diphenols and related substances as donors	Both	0	5	11	163	0	5	11	163
GO:0016681	oxidoreductase activity, acting on diphenols and related substances as donors, cytochrome as acceptor	Both	0	5	10	163	0	5	10	163
GO:0016779	nucleotidyltransferase activity	Both	0.035	27	113	815	0.035	17	113	815
GO:0016817	hydrolase activity, acting on acid anhydrides	SinkSource+	0.034	64	703	826
GO:0016818	hydrolase activity, acting on acid anhydrides, in phosphorus-containing anhydrides	SinkSource+	0.03	64	699	826
GO:0017111	nucleoside-triphosphatase activity	SinkSource+	0.006	64	669	826
GO:0017176	phosphatidylinositol N-acetylglucosaminyltransferase activity	SinkSource					0.003	4	5	826
GO:0019213	deacetylase activity	SinkSource+	0.003	9	17	985
GO:0019219	regulation of nucleobase, nucleoside, nucleotide and nucleic acid metabolic process	SinkSource+	0.002	228	2735	998
GO:0019222	regulation of metabolic process	SinkSource+	0	337	3605	998
GO:0019538	protein metabolic process	Both	0	218	2414	985	0	150	2414	985
GO:0019637	organophosphate metabolic process	SinkSource					0.022	19	188	985
GO:0019843	rRNA binding	Both	0	11	28	466	0	12	28	466
GO:0019866	organelle inner membrane	Both	0	61	277	308	0	51	277	308
GO:0019941	modification-dependent protein catabolic process	Both	0	51	245	759	0	24	245	759
GO:0022402	cell cycle process	Both	0	137	542	991	0	76	542	991
GO:0022403	cell cycle phase	Both	0.05	78	305	990	0.05	40	305	990
GO:0022411	cellular component disassembly	SinkSource+	0.023	9	38	473
GO:0022607	cellular component assembly	Both	0	151	912	994	0	116	912	994
GO:0022613	ribonucleoprotein complex biogenesis	Both	0	18	47	466	0	19	47	466
GO:0022618	ribonucleoprotein complex assembly	Both	0	38	87	711	0	35	87	711
GO:0022625	cytosolic large ribosomal subunit	Both	0	30	37	509	0	30	37	509
GO:0022627	cytosolic small ribosomal subunit	Both	0	31	41	474	0	32	41	474
GO:0022857	transmembrane transporter activity	SinkSource					0.001	23	867	474
GO:0022890	inorganic cation transmembrane transporter activity	Both	0	25	146	253	0	22	146	253
GO:0022891	substrate-specific transmembrane transporter activity	SinkSource					0.004	21	797	253
GO:0022892	substrate-specific transporter activity	SinkSource					0.004	23	933	253
GO:0022900	electron transport chain	Both	0	37	116	173	0	38	116	173
GO:0022904	respiratory electron transport chain	Both	0	30	68	172	0	30	68	172
GO:0023034	intracellular signaling pathway	SinkSource+	0	104	972	933
GO:0030029	actin filament-based process	SinkSource+	0.003	28	232	660
GO:0030036	actin cytoskeleton organization	SinkSource+	0.002	28	218	660
GO:0030234	enzyme regulator activity	Both	0	104	810	735	0	102	810	735
GO:0030374	ligand-dependent nuclear receptor transcription coactivator activity	SinkSource					0.001	4	31	735
GO:0030384	phosphoinositide metabolic process	SinkSource					0.014	13	63	735
GO:0030528	transcription regulator activity	SinkSource+	0.006	132	1448	1000
GO:0030529	ribonucleoprotein complex	Both	0	139	515	478	0	145	515	478
GO:0030530	heterogeneous nuclear ribonucleoprotein complex	Both	0	12	17	156	0	11	17	156
GO:0030532	small nuclear ribonucleoprotein complex	Both	0	15	38	76	0	17	38	76
GO:0030695	GTPase regulator activity	Both	0	87	387	652	0	81	387	652
GO:0030880	RNA polymerase complex	Both	0	11	26	347	0	11	26	347
GO:0030964	NADH dehydrogenase complex	Both	0	27	43	173	0	28	43	173
GO:0031090	organelle membrane	Both	0	73	1731	308	0	63	1731	308
GO:0031123	RNA 3'-end processing	Both	0	11	27	91	0	11	27	91
GO:0031124	mRNA 3'-end processing	Both	0	11	17	91	0	11	17	91
GO:0031145	anaphase-promoting complex-dependent proteasomal ubiquitin-dependent protein catabolic process	Both	0	42	67	630	0	26	67	630
GO:0031262	Ndc80 complex	SinkSource+	0.002	4	4	277
GO:0031323	regulation of cellular metabolic process	SinkSource+	0	330	3448	998
GO:0031324	negative regulation of cellular metabolic process	SinkSource+	0	126	754	990
GO:0031325	positive regulation of cellular metabolic process	SinkSource+	0	128	939	994
GO:0031326	regulation of cellular biosynthetic process	SinkSource+	0	248	2889	998
GO:0031327	negative regulation of cellular biosynthetic process	SinkSource+	0.002	67	582	990
GO:0031328	positive regulation of cellular biosynthetic process	SinkSource+	0.028	73	700	985
GO:0031396	regulation of protein ubiquitination	Both	0	50	117	880	0	23	117	880
GO:0031397	negative regulation of protein ubiquitination	Both	0	45	78	759	0	23	78	759
GO:0031398	positive regulation of protein ubiquitination	Both	0	46	96	880	0	23	96	880
GO:0031399	regulation of protein modification process	Both	0	65	343	880	0	26	343	880
GO:0031400	negative regulation of protein modification process	Both	0	47	127	769	0	23	127	769
GO:0031401	positive regulation of protein modification process	Both	0	53	224	880	0	25	224	880
GO:0031570	DNA integrity checkpoint	SinkSource+	0.006	14	46	991
GO:0031577	spindle checkpoint	SinkSource+	0	10	15	991
GO:0031966	mitochondrial membrane	Both	0	64	368	308	0	53	368	308
GO:0031967	organelle envelope	Both	0	22	107	338	0	11	107	338
GO:0031975	envelope	Both	0	22	107	338	0	11	107	338
GO:0032200	telomere organization	SinkSource+	0.001	13	31	990
GO:0032205	negative regulation of telomere maintenance	SinkSource+	0.029	6	8	990
GO:0032268	regulation of cellular protein metabolic process	Both	0	106	541	985	0	62	541	985
GO:0032269	negative regulation of cellular protein metabolic process	Both	0	56	195	769	0	31	195	769
GO:0032270	positive regulation of cellular protein metabolic process	Both	0	57	284	880	0	29	284	880
GO:0032319	regulation of Rho GTPase activity	SinkSource+	0.002	10	29	569
GO:0032774	RNA biosynthetic process	Both	0.027	37	223	367	0.027	32	223	367
GO:0032991	macromolecular complex	Both	0	360	3083	478	0	347	3083	478
GO:0033043	regulation of organelle organization	SinkSource+	0.002	37	229	991
GO:0033170	protein-DNA loading ATPase activity	SinkSource+	0.031	4	4	546
GO:0033177	proton-transporting two-sector ATPase complex, proton-transporting domain	Both	0	8	23	294	0	8	23	294
GO:0033276	transcription factor TFTC complex	SinkSource+	0.001	8	13	613
GO:0033279	ribosomal subunit	Both	0	63	126	474	0	63	126	474
GO:0033554	cellular response to stress	SinkSource+	0	78	522	991
GO:0033558	protein deacetylase activity	SinkSource+	0.002	9	15	985
GO:0034062	RNA polymerase activity	Both	0	17	39	753	0	13	39	753
GO:0034220	ion transmembrane transport	Both	0	12	48	294	0	12	48	294
GO:0034453	microtubule anchoring	SinkSource+	0.011	5	11	281
GO:0034621	cellular macromolecular complex subunit organization	Both	0	51	380	474	0	43	380	474
GO:0034622	cellular macromolecular complex assembly	Both	0	42	341	442	0	44	341	442
GO:0034641	cellular nitrogen compound metabolic process	Both	0	343	2005	998	0	274	2005	998
GO:0034645	cellular macromolecule biosynthetic process	Both	0	216	725	998	0	122	725	998
GO:0035023	regulation of Rho protein signal transduction	Both	0	35	76	680	0	26	76	680
GO:0042257	ribosomal subunit assembly	Both	0.004	5	5	474	0.004	5	5	474
GO:0042273	ribosomal large subunit biogenesis	Both	0.035	7	11	711	0.035	6	11	711
GO:0042274	ribosomal small subunit biogenesis	Both	0	9	12	711	0	9	12	711
GO:0042382	paraspeckles	SinkSource+	0.002	6	6	906
GO:0042776	mitochondrial ATP synthesis coupled proton transport	Both	0	11	14	294	0	11	14	294
GO:0042791	5S class rRNA transcription	SinkSource+	0.037	4	6	302
GO:0042797	tRNA transcription from RNA polymerase III promoter	SinkSource+	0.037	4	6	302
GO:0042809	vitamin D receptor binding	Both	0.012	9	14	881	0.012	3	14	881
GO:0042981	regulation of apoptosis	SinkSource+	0	97	822	998
GO:0043065	positive regulation of apoptosis	SinkSource+	0	75	432	998
GO:0043067	regulation of programmed cell death	SinkSource+	0	97	831	998
GO:0043068	positive regulation of programmed cell death	SinkSource+	0	75	434	998
GO:0043085	positive regulation of catalytic activity	SinkSource+	0	80	533	961
GO:0043086	negative regulation of catalytic activity	Both	0	45	290	630	0	23	290	630
GO:0043088	regulation of Cdc42 GTPase activity	SinkSource+	0.013	6	11	569
GO:0043161	proteasomal ubiquitin-dependent protein catabolic process	Both	0	47	114	709	0	23	114	709
GO:0043170	macromolecule metabolic process	Both	0	504	3813	991	0	317	3813	991
GO:0043226	organelle	Both	0	414	8388	450	0	488	8388	450
GO:0043227	membrane-bounded organelle	Both	0	322	7671	347	0	188	7671	347
GO:0043228	non-membrane-bounded organelle	Both	0	163	1738	496	0	188	1738	496
GO:0043229	intracellular organelle	Both	0	414	8375	450	0	487	8375	450
GO:0043231	intracellular membrane-bounded organelle	Both	0	322	7669	347	0	188	7669	347
GO:0043232	intracellular non-membrane-bounded organelle	Both	0	163	1738	496	0	188	1738	496
GO:0043234	protein complex	Both	0	206	2483	357	0	152	2483	357
GO:0043566	structure-specific DNA binding	SinkSource+	0.029	23	138	897
GO:0043631	RNA polyadenylation	Both	0.001	6	13	62	0.001	6	13	62
GO:0043632	modification-dependent macromolecule catabolic process	Both	0	51	245	759	0	24	245	759
GO:0043933	macromolecular complex subunit organization	Both	0	81	747	356	0	106	747	356
GO:0044085	cellular component biogenesis	Both	0	19	52	466	0	20	52	466
GO:0044092	negative regulation of molecular function	Both	0.007	63	360	990	0.007	23	360	990
GO:0044093	positive regulation of molecular function	SinkSource+	0	84	608	961
GO:0044237	cellular metabolic process	Both	0	601	4784	1000	0	410	4784	1000
GO:0044238	primary metabolic process	Both	0	543	5048	1000	0	359	5048	1000
GO:0044248	cellular catabolic process	Both	0	97	714	761	0	38	714	761
GO:0044249	cellular biosynthetic process	Both	0	238	1403	998	0	160	1403	998
GO:0044260	cellular macromolecule metabolic process	Both	0	499	3300	1000	0	310	3300	1000
GO:0044265	cellular macromolecule catabolic process	Both	0	76	380	760	0	29	380	760
GO:0044267	cellular protein metabolic process	Both	0.001	175	1795	991	0.001	116	1795	991
GO:0044419	interspecies interaction between organisms	Both	0.001	55	315	881	0.001	28	315	881
GO:0044422	organelle part	Both	0	618	4753	991	0	500	4753	991
GO:0044424	intracellular part	Both	0	895	10513	992	0	822	10513	992
GO:0044427	chromosomal part	SinkSource+	0	104	413	990
GO:0044428	nuclear part	Both	0	378	1725	991	0	186	1725	991
GO:0044429	mitochondrial part	Both	0	70	610	296	0	58	610	296
GO:0044444	cytoplasmic part	Both	0	436	4965	983	0	414	4965	983
GO:0044445	cytosolic part	Both	0	60	143	474	0	59	143	474
GO:0044446	intracellular organelle part	Both	0	618	4724	991	0	499	4724	991
GO:0044451	nucleoplasm part	Both	0	129	572	1000	0	89	572	1000
GO:0044454	nuclear chromosome part	SinkSource+	0	41	125	990
GO:0044455	mitochondrial membrane part	Both	0	50	132	308	0	47	132	308
GO:0044464	cell part	Both	0.001	667	14283	688	0.001	233	14283	688
GO:0045017	glycerolipid biosynthetic process	SinkSource					0.021	11	63	688
GO:0045182	translation regulator activity	SinkSource					0.004	10	23	688
GO:0045257	succinate dehydrogenase complex (ubiquinone)	SinkSource+	0.025	4	5	350
GO:0045259	proton-transporting ATP synthase complex	Both	0	12	17	294	0	12	17	294
GO:0045261	proton-transporting ATP synthase complex, catalytic core F(1)	Both	0	5	5	293	0	5	5	293
GO:0045263	proton-transporting ATP synthase complex, coupling factor F(o)	Both	0	8	14	294	0	8	14	294
GO:0045271	respiratory chain complex I	Both	0	27	43	173	0	28	43	173
GO:0045281	succinate dehydrogenase complex	SinkSource+	0.025	4	5	350
GO:0045283	fumarate reductase complex	SinkSource+	0.025	4	5	350
GO:0045333	cellular respiration	SinkSource+	0.011	7	25	350
GO:0045934	negative regulation of nucleobase, nucleoside, nucleotide and nucleic acid metabolic process	SinkSource+	0.001	65	527	990
GO:0045935	positive regulation of nucleobase, nucleoside, nucleotide and nucleic acid metabolic process	SinkSource+	0.01	69	634	985
GO:0045941	positive regulation of transcription	SinkSource+	0.01	63	558	985
GO:0046034	ATP metabolic process	Both	0	13	101	294	0	13	101	294
GO:0046474	glycerophospholipid biosynthetic process	SinkSource					0.004	11	52	294
GO:0046486	glycerolipid metabolic process	SinkSource					0	22	155	294
GO:0046489	phosphoinositide biosynthetic process	SinkSource					0	11	29	294
GO:0046578	regulation of Ras protein signal transduction	Both	0	35	118	680	0	26	118	680
GO:0046907	intracellular transport	Both	0	75	637	982	0	42	637	982
GO:0046930	pore complex	Both	0	23	76	938	0	10	76	938
GO:0046933	hydrogen ion transporting ATP synthase activity, rotational mechanism	SinkSource					0.027	5	13	938
GO:0046966	thyroid hormone receptor binding	Both	0.035	8	23	613	0.035	3	23	613
GO:0048285	organelle fission	SinkSource+	0	48	199	701
GO:0048518	positive regulation of biological process	SinkSource+	0	225	2114	998
GO:0048519	negative regulation of biological process	SinkSource+	0	194	1884	991
GO:0048522	positive regulation of cellular process	SinkSource+	0	218	1927	998
GO:0048523	negative regulation of cellular process	SinkSource+	0	184	1726	998
GO:0050136	NADH dehydrogenase (quinone) activity	Both	0	28	44	173	0	29	44	173
GO:0050657	nucleic acid transport	Both	0	23	98	167	0	41	98	167
GO:0050658	RNA transport	Both	0	23	98	167	0	41	98	167
GO:0050789	regulation of biological process	SinkSource+	0	517	6591	998
GO:0050790	regulation of catalytic activity	SinkSource+	0	117	867	990
GO:0050794	regulation of cellular process	SinkSource+	0	503	6212	998
GO:0051028	mRNA transport	Both	0	22	87	167	0	35	87	167
GO:0051052	regulation of DNA metabolic process	SinkSource+	0.006	24	127	990
GO:0051053	negative regulation of DNA metabolic process	SinkSource+	0	18	48	990
GO:0051056	regulation of small GTPase mediated signal transduction	Both	0.022	35	160	680	0.022	27	160	680
GO:0051128	regulation of cellular component organization	SinkSource+	0.002	61	505	991
GO:0051129	negative regulation of cellular component organization	SinkSource+	0	32	164	991
GO:0051168	nuclear export	Both	0	19	60	919	0	17	60	919
GO:0051169	nuclear transport	Both	0	33	121	982	0	28	121	982
GO:0051171	regulation of nitrogen compound metabolic process	SinkSource+	0.001	230	2761	998
GO:0051172	negative regulation of nitrogen compound metabolic process	SinkSource+	0.002	65	535	990
GO:0051173	positive regulation of nitrogen compound metabolic process	SinkSource+	0.01	71	653	994
GO:0051234	establishment of localization	Both	0	72	2547	178	0	65	2547	178
GO:0051236	establishment of RNA localization	Both	0	23	98	167	0	41	98	167
GO:0051246	regulation of protein metabolic process	Both	0	108	600	985	0	63	600	985
GO:0051247	positive regulation of protein metabolic process	Both	0	58	294	880	0	29	294	880
GO:0051248	negative regulation of protein metabolic process	Both	0	56	202	769	0	31	202	769
GO:0051276	chromosome organization	SinkSource+	0.003	62	525	990
GO:0051301	cell division	Both	0.001	81	308	990	0.001	45	308	990
GO:0051303	establishment of chromosome localization	SinkSource+	0.009	8	15	930
GO:0051310	metaphase plate congression	SinkSource+	0.027	7	12	930
GO:0051313	attachment of spindle microtubules to chromosome	SinkSource+	0	5	5	281
GO:0051322	anaphase	SinkSource+	0.001	6	7	592
GO:0051340	regulation of ligase activity	Both	0	48	88	880	0	23	88	880
GO:0051351	positive regulation of ligase activity	Both	0	45	77	880	0	23	77	880
GO:0051352	negative regulation of ligase activity	Both	0	42	70	630	0	26	70	630
GO:0051383	kinetochore organization	SinkSource+	0.002	4	4	232
GO:0051436	negative regulation of ubiquitin-protein ligase activity during mitotic cell cycle	Both	0	42	66	630	0	26	66	630
GO:0051437	positive regulation of ubiquitin-protein ligase activity during mitotic cell cycle	Both	0	45	69	880	0	26	69	880
GO:0051438	regulation of ubiquitin-protein ligase activity	Both	0	48	85	880	0	23	85	880
GO:0051439	regulation of ubiquitin-protein ligase activity during mitotic cell cycle	Both	0	48	72	880	0	26	72	880
GO:0051443	positive regulation of ubiquitin-protein ligase activity	Both	0	45	74	880	0	26	74	880
GO:0051444	negative regulation of ubiquitin-protein ligase activity	Both	0	42	70	630	0	26	70	630
GO:0051603	proteolysis involved in cellular protein catabolic process	Both	0	61	271	978	0	24	271	978
GO:0051649	establishment of localization in cell	Both	0.05	92	819	982	0.05	33	819	982
GO:0051656	establishment of organelle localization	SinkSource+	0	17	45	930
GO:0051704	multi-organism process	SinkSource+	0.002	37	638	357
GO:0051716	cellular response to stimulus	SinkSource+	0	91	775	991
GO:0051726	regulation of cell cycle	SinkSource+	0	68	344	998
GO:0051783	regulation of nuclear division	SinkSource+	0.018	15	57	991
GO:0055029	nuclear DNA-directed RNA polymerase complex	Both	0	11	25	347	0	11	25	347
GO:0055085	transmembrane transport	Both	0	23	550	178	0	19	550	178
GO:0055114	oxidation reduction	Both	0	38	629	177	0	42	629	177
GO:0060255	regulation of macromolecule metabolic process	SinkSource+	0	315	3218	998
GO:0060589	nucleoside-triphosphatase regulator activity	Both	0	87	395	652	0	82	395	652
GO:0065003	macromolecular complex assembly	Both	0	76	701	356	0	72	701	356
GO:0065007	biological regulation	SinkSource+	0	531	7004	998
GO:0065009	regulation of molecular function	SinkSource+	0	128	1011	990
GO:0070003	threonine-type peptidase activity	Both	0	10	19	322	0	10	19	322
GO:0070461	SAGA-type complex	SinkSource+	0.002	9	22	637
GO:0070469	respiratory chain	Both	0	40	71	235	0	39	71	235
GO:0070925	organelle assembly	SinkSource+	0.002	15	51	968
GO:0070979	protein K11-linked ubiquitination	SinkSource+	0	9	15	630
GO:0071173	spindle assembly checkpoint	SinkSource+	0.003	8	13	991
GO:0071174	mitotic cell cycle spindle checkpoint	SinkSource+	0.036	7	12	991
GO:0080090	regulation of primary metabolic process	SinkSource+	0	318	3254	998
GO:0090079	translation regulator activity, nucleic acid binding	SinkSource					0.02	7	12	998
GO:0090304	nucleic acid metabolic process	Both	0	314	1391	998	0	225	1391	998
GO:0090305	nucleic acid phosphodiester bond hydrolysis	Both	0.01	7	41	82	0.01	8	41	82
