# Supplementary material for: Network-Based Prediction and Analysis of HIV Dependency Factors
Source: PLoS Comput Biol. 2011 Sep 22;7(9):e1002164. doi: 10.1371/journal.pcbi.1002164 (PMC3178628; doi:10.1371/journal.pcbi.1002164)
Supplement: Table S5 — Statistically-significant overlaps of BKZ HDFs with clusters computed by MCODE. Columns are (a) the ranking of the cluster by #PPIs, (b) the p-value of the overlap between BKZ HDFs and proteins in the cluster, (c) the #BKZ HDFs in the cluster, (d) the #proteins in the cluster, and (e) the fraction of proteins in the cluster that are BKZ HDFs. (XLS) [file pcbi.1002164.s015.xls]

## Sheet: supplementary-table-5
Ranking by #PPIs	p-value	#BKZ HDFs	#proteins	Fraction that are BKZ HDFs
1	4.92902e-11	31	112	0.27
4	0.0182196	10	57	0.18
7	2.76948e-08	11	20	0.55
8	1.48023e-13	20	37	0.54
9	0.0403419	9	56	0.16
28	0.00529982	5	9	0.55
37	0.00101526	3	3	1
40	0.00835637	3	3	1
41	0.00208732	3	3	1
